# Supplementary material
Source: MDPI journal article supplement (https://www.mdpi.com/2072-4292/14/8/1768)

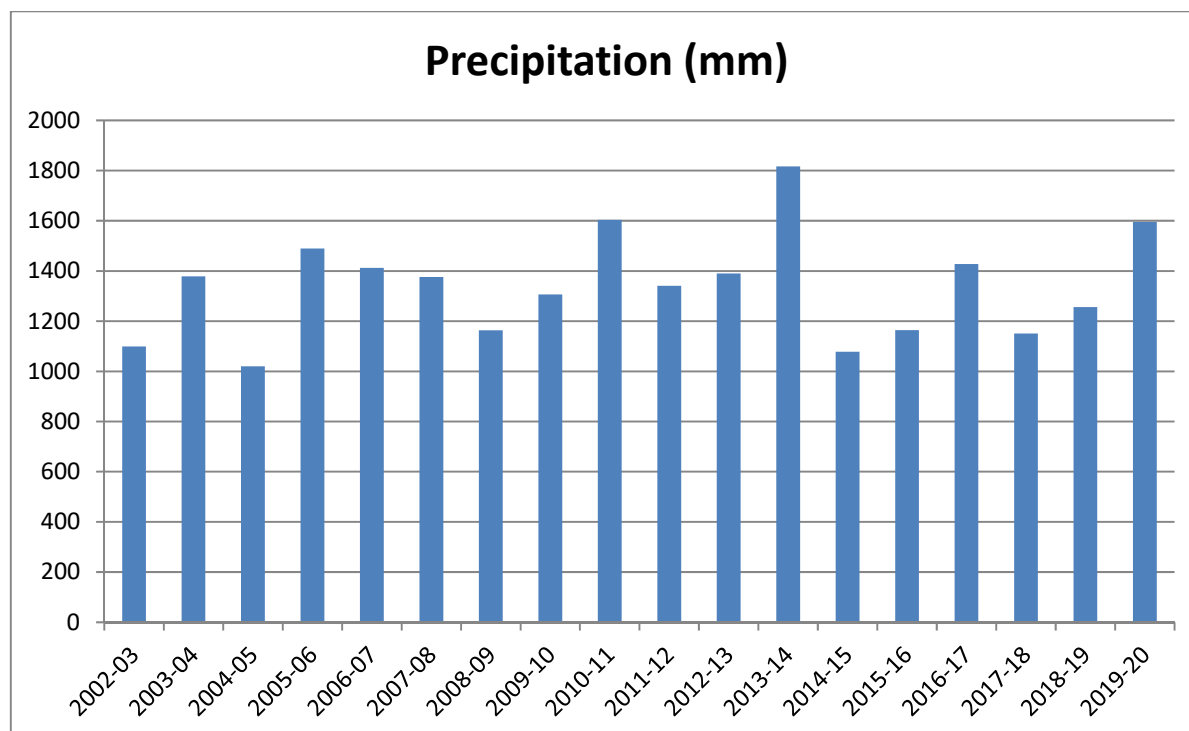

Figure S1. Annual mean (April to March) precipitation in the study region.

Supplement: s1 [file s1]
